# Supplementary material for: Persistent Response to a Combination Treatment Featuring a Targeted Agent and an Immune Checkpoint Inhibitor in a Patient With Collecting Duct Renal Carcinoma: A Case Report and Literature Review
Source: Front Oncol. 2021 Nov 8;11:764352. doi: 10.3389/fonc.2021.764352 (PMC8606665; doi:10.3389/fonc.2021.764352)
Supplement: Supplementary Table 1 — Genetic analysis of 618 genes related to the potential actionable somatic and pathogenic germline variants. [file Table_1.xlsx]

## Sheet: Sequencing genes
Hejian618G（tissue/blood）	A	B	C	D	E	F	G	H	I	J	K	L	M	N	O	P	Q	R	S	T	U	V	W	X	Y	Z
	ABL1	B2M	C11orf30	DAXX	E2F1	FAM175A	GABRA6	H3F3A	ICOSLG	JAK1	KAT6A	LATS1	MAGI2	NAT1	OPRM1	PAK1	QKI	RAB35	SDHA	TAF1	U2AF1	VEGFA	WEE1	XIAP	YAP1	ZBTB2
	ABL2	BABAM1	CALR	DCUN1D1	E2F3	FAM46C	GATA1	H3F3B	ID3	JAK2	KDM5A	LATS2	MALT1	NAT2		PAK3		RAC1	SDHAF2	TAP1	UPF1	VEGFB	WHSC1	XPA	YES1	ZFHX3
	ACVR1	BAP1	CARD11	DDB2	EED	FAM58A	GATA2	H3F3C	IDH1	JAK3	KDM5C	LMO1	MAP2K1	NBN		PAK7		RAC2	SDHB	TAP2		VHL	WHSC1L1	XPC		ZNF217
	ACVR1B	BARD1	CARM1	DDR2	EGF	FANCA	GATA3	HDAC1	IDH2	JUN	KDM6A	LRP1B	MAP2K2	NCOA3		PALB2		RAD21	SDHC	TBX3		VTCN1	WISP3	XPO1		ZNF703
	AGO2	BAX	CASP8	DICER1	EGFL7	FANCB	GATA4	HDAC2	IFNGR1		KDR	LRRK2	MAP2K4	NCOR1		PARK2		RAD50	SDHD	TCEB1			WNT1	XRCC2
	AIP	BBC3	CBFB	DIRAS3	EGFR	FANCC	GATA6	HDAC3	IGF1		KEAP1	LYN	MAP3K1	NEGR1		PARP1		RAD51	SESN1	TCF3			WNT5A
	AKT1	BCL10	CBL	DIS3	EIF1AX	FANCD2	GID4	HDAC4	IGF1R		KEL	LZTR1	MAP3K13	NF1		PARP2		RAD51B	SESN2	TCF7L2			WNT6
	AKT2	BCL11A	CCND1	DIS3L2	EIF4A2	FANCE	GLI1	HDAC6	IGF2		KIT		MAP3K14	NF2		PARP3		RAD51C	SESN3	TEK			WRN
	AKT3	BCL2	CCND2	DNAJB1	EIF4E	FANCF	GLI2	HDAC8	IGF2R		KLF4		MAP4K1	NFE2L2		PAX5		RAD51D	SETD2	TERT			WT1
	ALK	BCL2L1	CCND3	DNMT1	ELF3	FANCG	GNA11	HGF	IKBKE		KLHL6		MAPK1	NFKBIA		PBRM1		RAD52	SETD8	TET1			WWTR1
	ALOX12B	BCL2L11	CCNE1	DNMT3A	EML4	FANCI	GNA13	HIF1A	IKZF1		KMT2A		MAPK3	NKX2-1		PDCD1		RAD54L	SF3B1	TET2
	AMER1	BCL2L2	CD274	DNMT3B	EP300	FANCL	GNAQ	HIST1H1C	IL10		KMT2B		MAPKAP1	NKX3-1		PDCD1LG2		RAF1	SH2B3	TGFBR1
	ANKRD11	BCL6	CD276	DOT1L	EPAS1	FANCM	GNAS	HIST1H2BD	IL7R		KMT2C		MAX	NOTCH1		PDGFRA		RANBP2	SH2D1A	TGFBR2
	APC	BCOR	CD74	DROSHA	EPCAM	FAS	GOPC	HIST1H3A	IL8		KMT2D		MCL1	NOTCH2		PDGFRB		RARA	SHH	TMEM127
	AR	BCORL1	CD79A	DUSP4	EPHA3	FAT1	GPC3	HIST1H3B	INHA		KNSTRN		MDC1	NOTCH3		PDK1		RARB	SHOC2	TMPRSS2
	ARAF	BIRC3	CD79B		EPHA5	FAT4	GPR124	HIST1H3C	INHBA		KRAS		MDM2	NOTCH4		PDPK1		RASA1	SHQ1	TNF
	ARFRP1	BIRC5	CDC25C		EPHA7	FBXW7	GPS2	HIST1H3D	INPP4A				MDM4	NPM1		PEG3		RASSF1	SLC16A7	TNFAIP3
	ARID1A	BLCAP	CDC42		EPHB1	FGF10	GRB2	HIST1H3E	INPP4B				MED12	NRAS		PGR		RASSF8	SLC19A1	TNFRSF14
	ARID1B	BLK	CDC73		ERBB2	FGF14	GREM1	HIST1H3F	INPPL1				MEF2B	NRG1		PHOX2B		RB1	SLIT2	TNFSF11
	ARID2	BLM	CDH1		ERBB3	FGF19	GRIN2A	HIST1H3G	INSR				MEN1	NSD1		PIK3C2B		RBM10	SLX4	TOP1
	ARID5B	BMPR1A	CDK1		ERBB4	FGF23	GRM3	HIST1H3H	IRF2				MET	NTHL1		PIK3C2G		RECQL	SMAD2	TOP2A
	ASXL1	BRAF	CDK12		ERCC1	FGF3	GSK3B	HIST1H3I	IRF4				MGA	NTRK1		PIK3C3		RECQL4	SMAD3	TP53
	ASXL2	BRCA1	CDK2		ERCC2	FGF4	GSTA1	HIST1H3J	IRS1				MITF	NTRK2		PIK3CA		REL	SMAD4	TP53BP1
	ATM	BRCA2	CDK4		ERCC3	FGF6		HIST2H3C	IRS2				MLH1	NTRK3		PIK3CB		RET	SMARCA1	TP63
	ATR	BRD3	CDK5		ERCC4	FGFR1		HIST2H3D					MPL	NUF2		PIK3CD		RFWD2	SMARCA4	TPX2
	ATRX	BRD4	CDK6		ERCC5	FGFR2		HIST3H3					MRE11A	NUP93		PIK3CG		RHBDF2	SMARCB1	TRAF2
	AURKA	BRIP1	CDK7		ERF	FGFR3		HLA-A					MSH2			PIK3R1		RHEB	SMARCD1	TRAF7
	AURKB	BTG1	CDK8		ERG	FGFR4		HLA-B					MSH3			PIK3R2		RHOA	SMO	TSC1
	AXIN1	BTK	CDK9		ERRFI1	FH		HNF1A					MSH6			PIK3R3		RICTOR	SMYD3	TSC2
	AXIN2	BUB1	CDKN1A		ESR1	FLCN		HOXB13					MSI1			PIM1		RIT1	SNAI1	TSHR
	AXL	BUB1B	CDKN1B		ETV1	FLT1		HRAS					MSI2			PLCG2		RNF43	SNAI2	TUBB
		BUB3	CDKN1C		ETV6	FLT3		HSD3B1					MST1			PLK1		ROCK1	SNCAIP	TWIST1
			CDKN2A		EWSR1	FLT4		HSP90AA1					MST1R			PLK2		ROS1	SOCS1	TYMS
			CDKN2B		EXT1	FOLR3							MTOR			PMAIP1		RPS6KA1	SOS1
			CDKN2C		EXT2	FOXA1							MUTYH			PMS1		RPS6KA4	SOX10
			CEBPA		EZH1	FOXA2							MYC			PMS2		RPS6KB1	SOX17
			CENPA		EZH2	FOXL2							MYCL			PNRC1		RPS6KB2	SOX2
			CHD2			FOXO1							MYCN			POLD1		RPTOR	SOX9
			CHD3			FOXP1							MYD88			POLE		RRAGC	SPEN
			CHD4			FRS2							MYO1B			PPARG		RRAS	SPINK1
			CHEK1			FUBP1							MYOD1			PPM1D		RRAS2	SPOP
			CHEK2			FYN										PPP2R1A		RRM1	SPRED1
			CIC													PPP4R2		RTEL1	SPTA1
			CREBBP													PPP6C		RUNX1	SRC
			CRKL													PRDM1		RUNX1T1	SRSF2
			CRLF2													PRDM14		RUNX2	STAG2
			CSDE1													PREX2		RXRA	STAT3
			CSF1R													PRKAR1A		RYBP	STAT4
			CSF3R													PRKCE			STAT5A
			CTCF													PRKCG			STAT5B
			CTLA4													PRKCI			STK11
			CTNNA1													PRKD1			STK19
			CTNNB1													PRKDC			STK40
			CUL3													PRRT2			SUFU
			CXCR4													PRSS8			SUZ12
			CYLD													PTCH1			SYK
			CYSLTR2													PTCH2
																PTEN
																PTK2
																PTP4A1
																PTPN11
																PTPRD
																PTPRS
																PTPRT

## Sheet: Gene ateration and significance
Gene	Exon	Chromosome	Base mutation	amino acid	Mutations abundance	Gene annotation	Oncogenic	Detection method	mutation effects
ERRFI1	exon4	chr1:8074242-8074246	c.413_417delCCCTT	p.S138fs	0.153	ERRFI1 (also Mig6) is a scaffold protein involved in ERBB-mediated signaling (PMID: 17940511). ERRFI1 negatively regulates the EGF receptor family and HGF/SF-Met signaling (PMID: 16247031). CDC42 binding to ERRFI1 mediates the inhibitory activity on EGF receptor family members (PMID: 12833145). ERRFI1 regulates many cellular processes including cell signaling, development, tissue homeostasis, and…	Like oncogenic	Next-generation sequencing (NGS)	Like Loss-of-function
SPOP	exon3	chr17:47699343	c.164delC	p.S55fs	0.2645	SPOP (Speckle-type POZ protein) is an adaptor protein in the CUL3 ubiquitin ligase complex that recognizes substrates for ubiquitination and subsequent degradation via the proteasome (PMID: 19818708). The repertoire of SPOP substrates is not well characterized; however, notable proteins include SRC3, DAXX, H2AFY, AR, BMI1, DEK, ESR1 and TRIM24 (PMID: 25766326). The CUL3-SPOP complex negatively re…	Like oncogenic	Next-generation sequencing (NGS)	Loss-of-function
EP300	exon6	chr22:41527479	c.1370G>T	p.S457I	0.1074	EP300 (p300; E1A-binding protein) is a transcriptional co-activator with histone acetyltransferase (HAT) activity that is homologous to the co-activator CREBBP. EP300 activates transcription by opening chromatin at gene promoters, recruiting transcriptional machinery and acting as a co-factor to recruit transcription factors (PMID: 15691758). The HAT activity of EP300 can also regulate the expres…	Like oncogenic	Next-generation sequencing (NGS)	Loss-of-function
TEK	exon13	chr9:27202926	c.2018G>A	p.R673H	0.1449	The TEK gene encodes a receptor tyrosine kinase (RTK) protein also known as angiopoietin-1 receptor. Signaling via the TEK receptor has roles in angiogenesis, cell migration and proliferation (PMID: 19223473). The role of TEK in cancer depends on the predominant ligand binding the receptor, with angiopoietin-1 having an agonist effect and promoting angiogenesis and angiopoietin-2 having an antago…	Unclear	Next-generation sequencing (NGS)	Unclear

## Sheet: Method
Genomic DNA (gDNA) of tumor samples and germline DNA (from white blood cells) were isolated using QIAamp DNA FFPE Tissue Kit (Qiagen) according to the manufacturer’s instruction. Quantity and quality of the purified DNA were checked using Qubit 2.0 Fluorometer (Thermo fisher) and Bioanalyzer 2100 (Agilent Technologies).100 ng of gDNA was sheared with a Covaris E210 system (Covaris) to target frag…
